# Supplementary material for: Solubility in CO2and swelling studies by in situIR spectroscopy of vegetable-based epoxidized oils as polyurethane precursors
Source: Royal Society of Chemistry journal article supplement (doi:10.1039/c2py00476c), 2011-12-23
Supplement: c2py00476c.pdf [file c2py00476c.pdf]

Technical data sheet

Synthesized: 17/11/09

## L09-0191 : Epoxidized Oleic Methyl Ester (EOME)

OLEIC SUNFLOWER METHYLESTERS DERIVATE

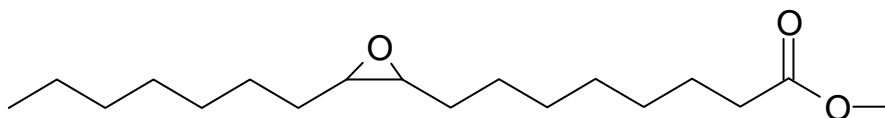

### CHARACTERISTICS

### UNITS

### VALUES

### METHODS

|               |                  |                 |              |
|---------------|------------------|-----------------|--------------|
| Acidity value | mgKOH/g          | 0.84 (+/- 0,09) | ISO 660:1996 |
| Oxirane value | % O <sub>2</sub> | 4.83 (+/- 0,08) | AOCS Cd 9-57 |
| Water content | %                | 0.28            |              |
| Purity (GC)   | %                | 82.4            |              |

### PHYSICAL PROPERTIES :

|                           |                       |
|---------------------------|-----------------------|
| Appearance at 20°C        | colorless oily liquid |
| Behavior in water at 20°C | insoluble             |
| Soluble at 25°C in        | most organic solvents |

### DELIVERED QUANTITY :

20g

### MAIN APPLICATIONS :

Analysis in supercritical CO<sub>2</sub>

Technical data sheet

Synthesized: 21/01/2010

## L10-0009: Epoxidized Ricinoleic Methyl Ester (ERME)

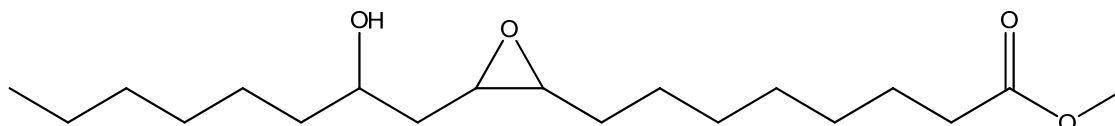

### CHARACTERISTICS

Water content

### UNITS

%

### VALUES

0.42

Acidity value

mgKOH/g

1.19

Oxirane value

%

3.57

Purity GC

%

62.4

### PHYSICAL PROPERTIES

Orange colored oily liquid

### DELIVERED QUANTITY :

20g

### MAIN APPLICATIONS

Analysis in supercritical CO<sub>2</sub>

Technical data sheet

**L090163: Epoxidized Linoleic Ethyl Ester (ELEE)**

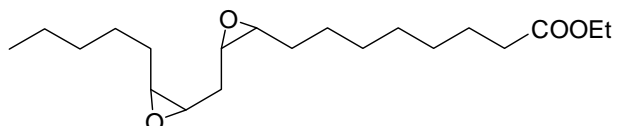

**CHARACTERISTICS**

|                                      | L09-0163             |           |
|--------------------------------------|----------------------|-----------|
| <b>Product</b>                       | ELEE (white cream)   |           |
| Acidity value (mgKOH/g)              | 0,98                 |           |
| Iodine Index(g I <sub>2</sub> /100g) | 4                    |           |
| Oxirane value (%)                    | 6,05                 |           |
| GC Analysis                          | Product              | %         |
|                                      | diepoxide            | <b>57</b> |
|                                      | monoepoxide          | 15        |
|                                      | Non epoxidized Ester | 15,8      |
|                                      | Non determined       | 12,2      |

**DELIVERED QUANTITY :**

20g

**MAIN APPLICATIONS :** Analysis in supercritical CO<sub>2</sub>

Technical data sheet

**L090180: Epoxidized Oleic Butyl diEster (EOBudE)**

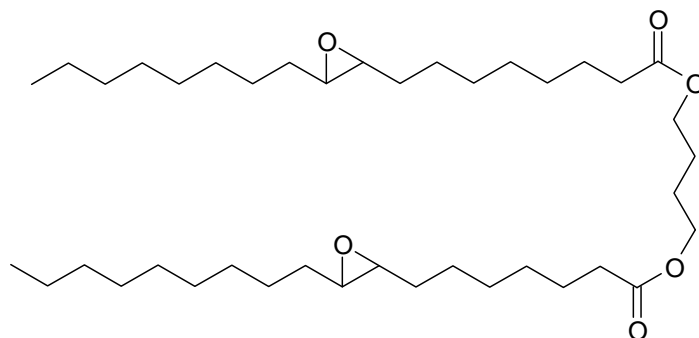

**CHARACTERISTICS**

|                                       | L09-0180             |             |
|---------------------------------------|----------------------|-------------|
| <b>Product</b>                        | EOBudE (white cream) |             |
| Acidity value (mgKOH/g)               | 9,26                 |             |
| Iodine Index (g I <sub>2</sub> /100g) | 4                    |             |
| Oxirane value (%)                     | 4,16                 |             |
| Analyse GC                            | Product              | %           |
|                                       | diepoxide            | <b>64,2</b> |
|                                       | monoepoxide          | 16,3        |
|                                       | Non epoxidized Ester | 14,3        |
|                                       | Non determined       | 5,2         |

**DELIVERED QUANTITY :**

20g

**MAIN APPLICATIONS :** Analysis in supercritical CO<sub>2</sub>

Technical data sheet

Synthesized: 18/05/11

## ML139: Epoxidized Oleic Propyl diEster (EOPrdE)

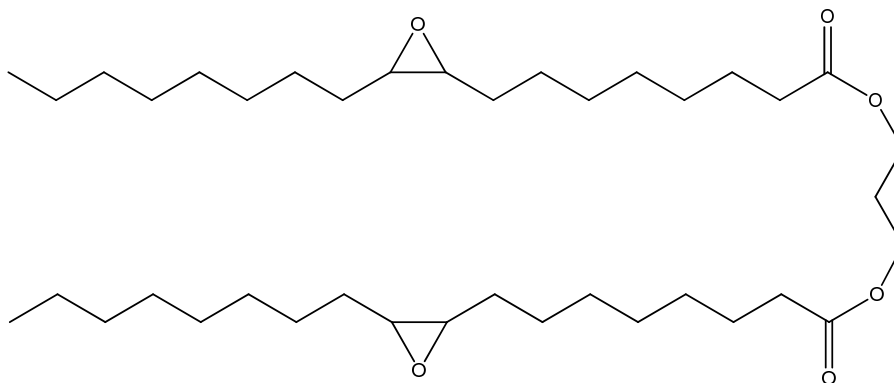

### CHARACTERISTICS

Acidity value  
Oxirane value  
Water content  
Purity (GC)

### UNITS

mgKOH/g  
% O<sub>2</sub>  
%  
%

### VALUES

nd  
nd  
nd  
69.5

### METHODS

ISO 660:1996  
AOCS Cd 9-57

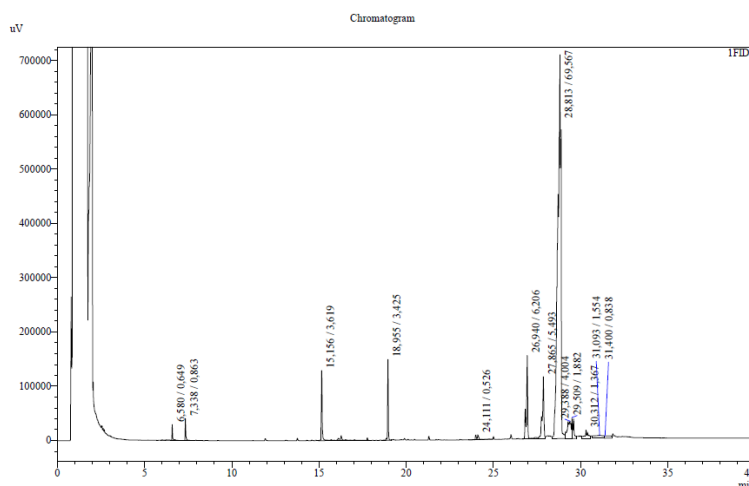

### PHYSICAL PROPERTIES :

Appearance at 20°C

white cream

Behavior in water at 20°C

nd

Soluble at 25°C in

most organic solvents

### DELIVERED QUANTITY :

15g

### MAIN APPLICATIONS :

Analysis in supercritical CO<sub>2</sub>

Technical data sheet

Synthesized: 18/05/11

## ML139 : Epoxidized Oleic Propyl diEster(EOPrdE)

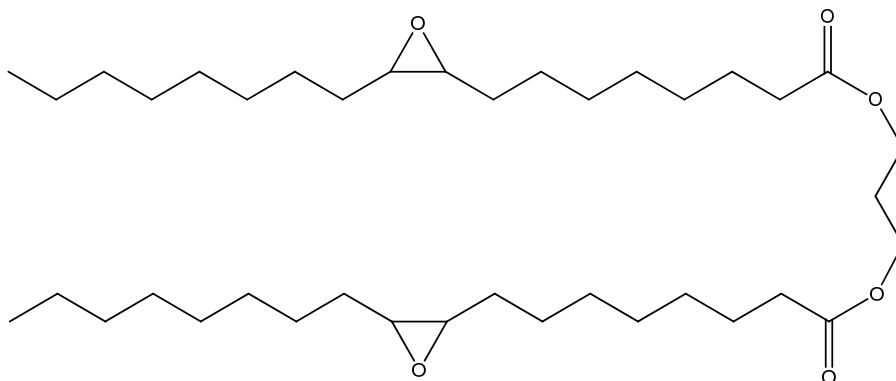

### CHARACTERISTICS

Acidity value  
Oxirane value  
Water content  
Purity (GC)

### UNITS

mgKOH/g  
% O<sub>2</sub>  
%  
%

### VALUES

nd  
nd  
nd  
69.5

### METHODS

ISO 660:1996  
AOCS Cd 9-57

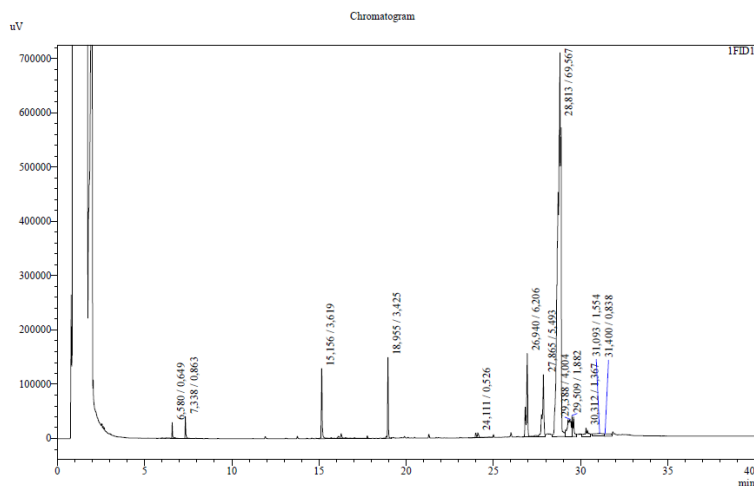

### PHYSICAL PROPERTIES :

Appearance at 20°C

white cream

Behavior in water at 20°C

nd

Soluble at 25°C in

most organic solvents

### DELIVERED QUANTITY :

15g

### MAIN APPLICATIONS :

Analysis in supercritical CO<sub>2</sub>

Technical data sheet

**L090182: Epoxidized Very High Oleic Sunflower Oil (EVHOSO)**

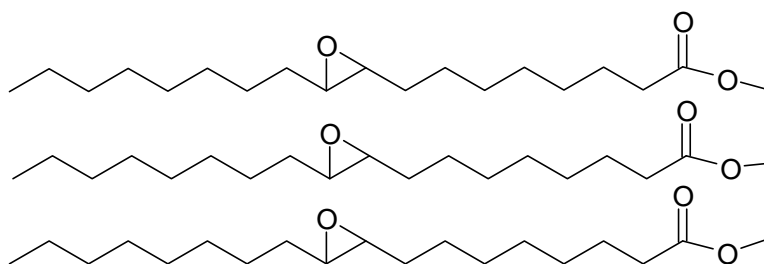

**CHARACTERISTICS**

|                                       | L09-0182             |
|---------------------------------------|----------------------|
| <b>Product</b>                        | EVHOSO (White solid) |
| Iodine Index (g I <sub>2</sub> /100g) | 90                   |
| Acidity value (mgKOH/g)               | 1,25                 |
| Oxirane value (%)                     | 4,88                 |

**DELIVERED QUANTITY :**

20g

**MAIN APPLICATIONS :** Analysis in supercritical CO<sub>2</sub>

## Supporting Information for :

### Solubility in CO<sub>2</sub> and Swelling studies by in situ IR spectroscopy of Vegetable-Based Epoxidized Oils as Polyurethane precursors

Tables of values for each VBEO in the VBEO-rich phase and in the CO<sub>2</sub>-rich phase

**Comment:**

$\rho$  (**g.cm<sup>-3</sup>**) represents the CO<sub>2</sub> density calculated from NIST thermodynamics data for pure CO<sub>2</sub>;

[CO<sub>2</sub>] (**mol.L<sup>-1</sup>**) represents the CO<sub>2</sub> concentration calculated from the experimental FTIR spectra in the considered phase;

[VBEO] (**mol.L<sup>-1</sup>**) represents the VBEO concentration calculated from the experimental FTIR spectra in the considered phase;

XCO<sub>2</sub> represents the molar fraction of CO<sub>2</sub> calculated from the CO<sub>2</sub> and VBEO molar concentrations.



1°) EOME

EOME-rich phase :

| T (°C) | P (MPa) | $\rho$ (g.cm <sup>-3</sup> ) | Swelling (%) | [CO <sub>2</sub> ] (mol.L <sup>-1</sup> ) | [EOME] (mol.L <sup>-1</sup> ) | X <sub>CO<sub>2</sub></sub> |
|--------|---------|------------------------------|--------------|-------------------------------------------|-------------------------------|-----------------------------|
| 100    | 20      | 0.48503                      | 102.84       | 7.87                                      | 1.42                          | 0.85                        |
| 100    | 18      | 0.42481                      | 93.25        | 6.99                                      | 1.49                          | 0.82                        |
| 100    | 16      | 0.36369                      | 65.32        | 5.92                                      | 1.74                          | 0.77                        |
| 100    | 14      | 0.3013                       | 53.77        | 5.22                                      | 1.87                          | 0.74                        |
| 100    | 12      | 0.24207                      | 38.84        | 4.43                                      | 2.07                          | 0.68                        |
| 100    | 10      | 0.18856                      | 27.11        | 3.46                                      | 2.26                          | 0.60                        |
| 100    | 8       | 0.14127                      | 18.68        | 2.78                                      | 2.42                          | 0.53                        |
| 100    | 6       | 0.099632                     | 15.79        | 2.36                                      | 2.48                          | 0.49                        |
| 100    | 4       | 0.062749                     | 10.00        | 1.57                                      | 2.62                          | 0.37                        |
| 100    | 2       | 0.029774                     | 4.38         | 0.99                                      | 2.76                          | 0.26                        |
| 100    | 0.1     | 0.0014218                    | 0.00         | 0.00                                      | 2.88                          |                             |
| 70     | 20      | 0.65905                      | 137.80       | 9.93                                      | 1.28                          | 0.89                        |
| 70     | 18      | 0.61224                      | 135.94       | 9.44                                      | 1.29                          | 0.88                        |
| 70     | 16      | 0.54775                      | 127.07       | 9.31                                      | 1.34                          | 0.87                        |
| 70     | 14      | 0.45662                      | 106.85       | 8.45                                      | 1.47                          | 0.85                        |
| 70     | 12      | 0.34585                      | 78.70        | 7.35                                      | 1.70                          | 0.81                        |
| 70     | 10      | 0.24777                      | 52.53        | 5.85                                      | 1.99                          | 0.75                        |
| 70     | 9       | 0.20804                      | 47.32        | 5.38                                      | 2.06                          | 0.72                        |
| 70     | 8       | 0.17362                      | 39.82        | 5.02                                      | 2.17                          | 0.70                        |
| 70     | 6       | 0.11681                      | 27.43        | 3.79                                      | 2.38                          | 0.61                        |
| 70     | 5       | 0.092865                     | 19.84        | 3.11                                      | 2.54                          | 0.55                        |
| 70     | 4       | 0.07116                      | 15.27        | 2.48                                      | 2.64                          | 0.49                        |
| 70     | 2       | 0.032973                     | 3.78         | 1.23                                      | 2.93                          | 0.30                        |
| 70     | 0.1     | 0.0015473                    | 0.00         | 0.00                                      | 3.04                          |                             |
| 40     | 20      | 0.83981                      | 154.84       | 12.49                                     | 1.25                          | 0.91                        |
| 40     | 15      | 0.78023                      | 150.80       | 12.07                                     | 1.27                          | 0.90                        |
| 40     | 12.8    | 0.73847                      | 152.81       | 12.00                                     | 1.26                          | 0.91                        |
| 40     | 10      | 0.62861                      | 152.81       | 12.01                                     | 1.26                          | 0.91                        |
| 40     | 9       | 0.4855                       | 110.67       | 10.43                                     | 1.51                          | 0.87                        |
| 40     | 8       | 0.2779                       | 75.56        | 9.06                                      | 1.81                          | 0.83                        |
| 40     | 7       | 0.19802                      | 49.06        | 7.13                                      | 2.13                          | 0.77                        |
| 40     | 6       | 0.14926                      | 43.64        | 6.33                                      | 2.21                          | 0.74                        |
| 40     | 5.5     | 0.1337                       | 37.39        | 5.61                                      | 2.31                          | 0.71                        |
| 40     | 4       | 0.083758                     | 23.44        | 3.96                                      | 2.58                          | 0.61                        |
| 40     | 2       | 0.037127                     | 5.34         | 2.02                                      | 3.02                          | 0.40                        |
| 40     | 0.1     | 0.0016975                    | 0.00         | 0.00                                      | 3.18                          |                             |

**CO<sub>2</sub>-rich phase :**

| T (°C) | P (MPa) | $\rho$ (g.cm <sup>-3</sup> ) | [CO <sub>2</sub> ] (mol.L <sup>-1</sup> ) | [EOME] (mol.L <sup>-1</sup> ) | X <sub>CO<sub>2</sub></sub> |
|--------|---------|------------------------------|-------------------------------------------|-------------------------------|-----------------------------|
| 100    | 20      | 0.48053                      | 10.6687                                   | 0.0217                        | 0.9980                      |
| 100    | 18      | 0.42481                      | 9.2247                                    | 0.0217                        | 0.9976                      |
| 100    | 15      | 0.33235                      | 6.8180                                    | 0.0039                        | 0.9994                      |
| 100    | 12      | 0.24207                      | 4.9783                                    | 0.0011                        | 0.9998                      |
| 100    | 10      | 0.18856                      | 3.5277                                    | 0.0003                        | 0.9999                      |
| 100    | 8       | 0.14127                      | 2.6441                                    | 0.0001                        | 1.0000                      |
| 100    | 5       | 0.080651                     | 1.3781                                    | 0.0000                        | 1.0000                      |
| 100    | 2       | 0.029774                     | 0.5407                                    | 0.0000                        | 1.0000                      |
| 100    | 0.1     | 0.0014218                    | 0.0000                                    | 0.0000                        |                             |
| 70     | 20      | 0.65905                      | 17.1010                                   | 0.0148                        | 0.9991                      |
| 70     | 15      | 0.50588                      | 12.0635                                   | 0.0035                        | 0.9997                      |
| 70     | 12      | 0.34585                      | 7.4994                                    | 0.0022                        | 0.9997                      |
| 70     | 10      | 0.24777                      | 4.5072                                    | 0.0003                        | 0.9999                      |
| 70     | 8       | 0.17362                      | 3.1816                                    | 0.0001                        | 1.0000                      |
| 70     | 5       | 0.032963                     | 1.7234                                    | 0.0000                        | 1.0000                      |
| 70     | 2       | 0.032963                     | 0.5492                                    | 0.0000                        | 1.0000                      |
| 70     | 0.1     | 0.0015473                    | 0.0000                                    | 0.0000                        |                             |
| 40     | 20      | 0.83981                      | 17.0675                                   | 0.3345                        | 0.9808                      |
| 40     | 18      | 0.83009                      | 16.9403                                   | 0.3366                        | 0.9805                      |
| 40     | 15.5    | 0.78023                      | 16.0784                                   | 0.3267                        | 0.9801                      |
| 40     | 14      | 0.76327                      | 15.7535                                   | 0.3236                        | 0.9799                      |
| 40     | 12      | 0.71776                      | 16.0926                                   | 0.0123                        | 0.9992                      |
| 40     | 11      | 0.68352                      | 15.0612                                   | 0.0062                        | 0.9996                      |
| 40     | 10      | 0.62861                      | 13.8602                                   | 0.0060                        | 0.9996                      |
| 40     | 8       | 0.2779                       | 6.0311                                    | 0.0005                        | 0.9999                      |
| 40     | 0.1     | 0.0016975                    | 0.0000                                    | 0.0000                        |                             |

## 2°) ERME

### ERMEE-rich phase

| T (°C) | P (MPa) | $\rho$ (g.cm <sup>-3</sup> ) | Swelling (%) | [CO <sub>2</sub> ] (mol.L <sup>-1</sup> ) | [ERME] (mol.L <sup>-1</sup> ) | X <sub>CO<sub>2</sub></sub> |
|--------|---------|------------------------------|--------------|-------------------------------------------|-------------------------------|-----------------------------|
| 100    | 29      | 0.64915                      | 66.84        | 7.92                                      | 1.66                          | 0.83                        |
| 100    | 20      | 0.48053                      | 52.33        | 6.52                                      | 1.82                          | 0.80                        |
| 100    | 18      | 0.42481                      | 42.42        | 5.70                                      | 1.94                          | 0.78                        |
| 100    | 16      | 0.36369                      | 36.86        | 5.04                                      | 2.02                          | 0.75                        |
| 100    | 15      | 0.33235                      | 32.71        | 4.64                                      | 2.09                          | 0.74                        |
| 100    | 14      | 0.3013                       | 28.81        | 4.29                                      | 2.15                          | 0.73                        |
| 100    | 12      | 0.24207                      | 24.24        | 3.60                                      | 2.23                          | 0.68                        |
| 100    | 10      | 0.18856                      | 23.37        | 2.86                                      | 2.25                          | 0.64                        |
| 100    | 9.5     | 0.16416                      | 18.37        | 2.41                                      | 2.34                          | 0.60                        |
| 100    | 8       | 0.14127                      | 17.57        | 1.92                                      | 2.36                          | 0.56                        |
| 100    | 6       | 0.099632                     | 10.87        | 1.32                                      | 2.50                          | 0.48                        |
| 100    | 5       | 0.080651                     | 9.49         | 0.64                                      | 2.53                          | 0.40                        |
| 100    | 2       | 0.029774                     | 6.82         | 0.07                                      | 2.59                          | 0.03                        |
| 100    | 0.1     | 0.0014218                    | 0.00         | 0.00                                      | 2.77                          |                             |
| 70     | 20      | 0.65905                      | 102.13       | 9.75                                      | 1.61                          | 0.86                        |
| 70     | 18      | 0.61224                      | 92.68        | 9.13                                      | 1.69                          | 0.85                        |
| 70     | 16      | 0.54775                      | 84.08        | 8.69                                      | 1.77                          | 0.84                        |
| 70     | 15      | 0.50588                      | 79.28        | 8.28                                      | 1.82                          | 0.83                        |
| 70     | 14      | 0.45662                      | 71.81        | 7.86                                      | 1.90                          | 0.80                        |
| 70     | 12      | 0.34585                      | 56.19        | 6.82                                      | 2.09                          | 0.77                        |
| 70     | 10      | 0.24777                      | 53.86        | 5.78                                      | 2.12                          | 0.73                        |
| 70     | 9       | 0.20804                      | 49.40        | 5.00                                      | 2.18                          | 0.69                        |
| 70     | 8       | 0.17362                      | 44.17        | 4.68                                      | 2.26                          | 0.67                        |
| 70     | 7       | 0.1435                       | 30.49        | 3.58                                      | 2.50                          | 0.59                        |
| 70     | 6       | 0.11681                      | 33.88        | 2.94                                      | 2.44                          | 0.55                        |
| 70     | 4       | 0.07116                      | 21.99        | 1.46                                      | 2.67                          | 0.38                        |
| 70     | 2       | 0.032963                     | 13.28        | 0.21                                      | 2.88                          | 0.19                        |
| 70     | 0.1     | 0.0015473                    | 0.00         | 0.00                                      | 3.26                          |                             |
| 40     | 30      | 0.90989                      | 190.55       | 16.65                                     | 1.09                          | 0.94                        |
| 40     | 20      | 0.83981                      | 133.11       | 13.33                                     | 1.36                          | 0.91                        |
| 40     | 18      | 0.83009                      | 115.57       | 12.56                                     | 1.47                          | 0.90                        |
| 40     | 16      | 0.7949                       | 113.27       | 12.21                                     | 1.49                          | 0.89                        |
| 40     | 15      | 0.78023                      | 108.83       | 11.63                                     | 1.52                          | 0.88                        |
| 40     | 14      | 0.76327                      | 111.03       | 10.89                                     | 1.50                          | 0.88                        |
| 40     | 12      | 0.71776                      | 89.13        | 10.17                                     | 1.68                          | 0.86                        |
| 40     | 10      | 0.62861                      | 80.61        | 9.15                                      | 1.76                          | 0.84                        |
| 40     | 9       | 0.4855                       | 79.00        | 8.39                                      | 1.77                          | 0.83                        |
| 40     | 8       | 0.2779                       | 69.90        | 7.22                                      | 1.87                          | 0.79                        |
| 40     | 6       | 0.14926                      | 35.46        | 4.30                                      | 2.34                          | 0.65                        |
| 40     | 5       | 0.11305                      | 31.03        | 2.65                                      | 2.42                          | 0.52                        |
| 40     | 4       | 0.083758                     | 29.34        | 1.59                                      | 2.45                          | 0.39                        |
| 40     | 2       | 0.037127                     | 10.15        | 0.09                                      | 2.88                          | 0.03                        |
| 40     | 0.1     | 0.0016975                    | 0.00         | 0.00                                      | 3.16                          |                             |

**CO<sub>2</sub>-rich phase :**

| T (°C) | P (MPa) | $\rho$ (g.cm <sup>-3</sup> ) | [CO <sub>2</sub> ] (mol.L <sup>-1</sup> ) | [ERME] (mol.L <sup>-1</sup> ) | X <sub>CO<sub>2</sub></sub> |
|--------|---------|------------------------------|-------------------------------------------|-------------------------------|-----------------------------|
| 100    | 20      | 0.48053                      | 10.4916                                   | 0.0084                        | 0.9992                      |
| 100    | 18      | 0.42481                      | 8.5031                                    | 0.0049                        | 0.9994                      |
| 100    | 15      | 0.33235                      | 6.2306                                    | 0.0012                        | 0.9998                      |
| 100    | 12      | 0.24207                      | 4.0906                                    | 0.0002                        | 0.9999                      |
| 100    | 10      | 0.18856                      | 3.2195                                    | 0.0001                        | 1.0000                      |
| 100    | 8       | 0.14127                      | 1.9885                                    | 0.0000                        | 1.0000                      |
| 100    | 5       | 0.080651                     | 1.0605                                    | 0.0000                        | 1.0000                      |
| 100    | 2       | 0.029774                     | 0.3788                                    | 0.0000                        | 1.0000                      |
| 100    | 0.1     | 0.0014218                    |                                           |                               |                             |
| 70     | 20      | 0.65905                      | 16.6086                                   | 0.0175                        | 0.9989                      |
| 70     | 18      | 0.61224                      | 14.4497                                   | 0.0081                        | 0.9994                      |
| 70     | 15      | 0.50588                      | 11.3817                                   | 0.0046                        | 0.9996                      |
| 70     | 12      | 0.34585                      | 7.1775                                    | 0.0005                        | 0.9999                      |
| 70     | 10      | 0.24777                      | 4.7534                                    | 0.0002                        | 1.0000                      |
| 70     | 8       | 0.17362                      | 3.0111                                    | 0.0001                        | 1.0000                      |
| 70     | 5       | 0.092865                     | 1.3825                                    | 0.0000                        | 1.0000                      |
| 70     | 2       | 0.032963                     | 0.6060                                    | 0.0000                        | 1.0000                      |
| 70     | 0.1     | 0.0015473                    |                                           |                               |                             |
| 40     | 30      | 0.90989                      | 28.1039                                   | 0.0911                        | 0.9967                      |
| 40     | 20      | 0.83981                      | 25.0928                                   | 0.0918                        | 0.9964                      |
| 40     | 18      | 0.83009                      | 23.9755                                   | 0.0915                        | 0.9962                      |
| 40     | 15      | 0.78023                      | 22.8013                                   | 0.0564                        | 0.9975                      |
| 40     | 12      | 0.71776                      | 20.6424                                   | 0.0092                        | 0.9996                      |
| 40     | 10      | 0.62861                      | 17.4229                                   | 0.0031                        | 0.9997                      |
| 40     | 8       | 0.2779                       | 5.3973                                    | 0.0000                        | 1.0000                      |
| 40     | 6       | 0.14926                      | 2.3104                                    | 0.0000                        | 1.0000                      |
| 40     | 2       | 0.037127                     | 0.6439                                    | 0.0000                        | 1.0000                      |
| 40     | 0.1     | 0.0016975                    | 0.0000                                    | 0.0000                        |                             |

### 3°) ELEE

#### ELEEE-rich phase

| T (°C) | P (MPa) | $\rho$ (g.cm <sup>-3</sup> ) | Swelling (%) | [CO <sub>2</sub> ] (mol.L <sup>-1</sup> ) | [ELEE] (mol.L <sup>-1</sup> ) | X <sub>CO<sub>2</sub></sub> |
|--------|---------|------------------------------|--------------|-------------------------------------------|-------------------------------|-----------------------------|
| 100    | 20      | 0.65905                      | 57.49        | 6.36                                      | 1.77                          | 0.78                        |
| 100    | 18      | 0.61224                      | 59.77        | 6.23                                      | 1.74                          | 0.78                        |
| 100    | 16      | 0.54775                      | 52.06        | 5.85                                      | 1.83                          | 0.76                        |
| 100    | 15      | 0.50588                      | 49.99        | 5.64                                      | 1.85                          | 0.75                        |
| 100    | 14      | 0.45662                      | 46.02        | 5.17                                      | 1.90                          | 0.73                        |
| 100    | 12      | 0.34585                      | 43.17        | 4.98                                      | 1.94                          | 0.72                        |
| 100    | 11      | 0.24777                      | 38.67        | 4.58                                      | 2.00                          | 0.70                        |
| 100    | 10      | 0.20804                      | 33.63        | 4.09                                      | 2.08                          | 0.66                        |
| 100    | 9       | 0.17362                      | 27.45        | 3.33                                      | 2.18                          | 0.60                        |
| 100    | 7       | 0.1435                       | 21.14        | 2.63                                      | 2.29                          | 0.53                        |
| 100    | 6       | 0.11681                      | 17.91        | 1.97                                      | 2.36                          | 0.46                        |
| 100    | 5       | 0.092865                     | 14.83        | 1.50                                      | 2.42                          | 0.38                        |
| 100    | 4       | 0.07116                      | 12.49        | 1.00                                      | 2.47                          | 0.29                        |
| 100    | 2       | 0.032963                     | 8.61         | 0.25                                      | 2.56                          | 0.09                        |
| 100    | 1       | 0.015927                     | 2.55         | 0.00                                      | 2.71                          |                             |
| 100    | 0.1     | 0.0014218                    | 0.00         | 0.00                                      | 2.77                          |                             |
| 70     | 20      | 0.65905                      | 88.02        | 9.26                                      | 1.46                          | 0.86                        |
| 70     | 18      | 0.61224                      | 81.75        | 8.83                                      | 1.51                          | 0.85                        |
| 70     | 16      | 0.54775                      | 84.83        | 8.65                                      | 1.49                          | 0.85                        |
| 70     | 15      | 0.50588                      | 74.48        | 8.43                                      | 1.58                          | 0.84                        |
| 70     | 14      | 0.45662                      | 70.39        | 7.50                                      | 1.61                          | 0.82                        |
| 70     | 12      | 0.34585                      | 55.79        | 6.63                                      | 1.77                          | 0.79                        |
| 70     | 10      | 0.24777                      | 52.52        | 6.31                                      | 1.80                          | 0.78                        |
| 70     | 9       | 0.20804                      | 48.37        | 5.72                                      | 1.85                          | 0.76                        |
| 70     | 8       | 0.17362                      | 38.92        | 5.32                                      | 1.98                          | 0.73                        |
| 70     | 7       | 0.1435                       | 36.31        | 4.26                                      | 2.02                          | 0.68                        |
| 70     | 6       | 0.11681                      | 24.63        | 3.12                                      | 2.21                          | 0.59                        |
| 70     | 5       | 0.092865                     | 25.35        | 2.78                                      | 2.19                          | 0.56                        |
| 70     | 4       | 0.07116                      | 17.26        | 1.72                                      | 2.35                          | 0.42                        |
| 70     | 2.5     | 0.032963                     | 11.28        | 1.14                                      | 2.47                          | 0.31                        |
| 70     | 1.2     | 0.015927                     | 4.86         | 0.00                                      | 2.62                          |                             |
| 70     | 0.1     | 0.0015473                    | 0.00         | 0.00                                      | 2.75                          |                             |
| 40     | 20      | 0.83981                      | 300.58       | 19.54                                     | 0.74                          | 0.96                        |
| 40     | 18      | 0.83009                      | 329.72       | 19.28                                     | 0.69                          | 0.97                        |
| 40     | 15      | 0.78023                      | 293.91       | 18.67                                     | 0.76                          | 0.96                        |
| 40     | 14      | 0.76327                      | 263.61       | 17.99                                     | 0.82                          | 0.96                        |
| 40     | 12      | 0.71776                      | 191.78       | 16.27                                     | 1.02                          | 0.94                        |
| 40     | 10      | 0.62861                      | 151.43       | 14.51                                     | 1.19                          | 0.92                        |
| 40     | 9       | 0.4855                       | 120.88       | 13.28                                     | 1.35                          | 0.91                        |
| 40     | 8       | 0.2779                       | 100.29       | 12.16                                     | 1.49                          | 0.89                        |
| 40     | 6       | 0.14926                      | 54.47        | 9.28                                      | 1.93                          | 0.83                        |
| 40     | 5       | 0.11305                      | 36.62        | 7.04                                      | 2.18                          | 0.76                        |
| 40     | 4       | 0.083758                     | 24.39        | 5.40                                      | 2.40                          | 0.69                        |
| 40     | 2       | 0.037127                     | 9.42         | 2.18                                      | 2.72                          | 0.44                        |
| 40     | 1       | 0.017669                     | 1.00         | 0.00                                      | 2.95                          |                             |
| 40     | 0.1     | 0.0016975                    | 0.00         | 0.00                                      | 2.98                          |                             |

**CO<sub>2</sub>-rich phase :**

| T (°C) | P (MPa) | $\rho$ (g.cm <sup>-3</sup> ) | [CO <sub>2</sub> ] (mol.L <sup>-1</sup> ) | [ELEE] (mol.L <sup>-1</sup> ) | X <sub>CO<sub>2</sub></sub> |
|--------|---------|------------------------------|-------------------------------------------|-------------------------------|-----------------------------|
| 100    | 20      | 0.48053                      | 9.6962                                    | 0.0150                        | 0.9985                      |
| 100    | 18      | 0.42481                      | 8.5789                                    | 0.0080                        | 0.9991                      |
| 100    | 15      | 0.33235                      | 6.3442                                    | 0.0020                        | 0.9997                      |
| 100    | 12      | 0.24207                      | 3.8444                                    | 0.0004                        | 0.9999                      |
| 100    | 10      | 0.18856                      | 2.9164                                    | 0.0001                        | 1.0000                      |
| 100    | 8       | 0.14127                      | 2.0074                                    | 0.0000                        | 1.0000                      |
| 100    | 5       | 0.080651                     | 1.0037                                    | 0.0000                        | 1.0000                      |
| 100    | 2       | 0.029774                     | 0.3219                                    | 0.0000                        | 1.0000                      |
| 100    | 0.1     | 0.0014218                    | 0.0000                                    | 0.0000                        |                             |
| 70     | 20      | 0.65905                      | 18.0479                                   | 0.0251                        | 0.9986                      |
| 70     | 18      | 0.61224                      | 15.5102                                   | 0.0103                        | 0.9993                      |
| 70     | 15      | 0.50588                      | 11.7605                                   | 0.0053                        | 0.9995                      |
| 70     | 12      | 0.34585                      | 7.3669                                    | 0.0018                        | 0.9998                      |
| 70     | 10      | 0.24777                      | 4.7156                                    | 0.0002                        | 1.0000                      |
| 70     | 8       | 0.17362                      | 3.2005                                    | 0.0001                        | 1.0000                      |
| 70     | 2       | 0.032963                     | 0.7575                                    | 0.0000                        | 1.0000                      |
| 70     | 0.1     | 0.0015473                    | 0.0000                                    | 0.0000                        |                             |
| 40     | 20      | 0.83981                      | 18.5213                                   | 0.4788                        | 0.9748                      |
| 40     | 15      | 0.78023                      | 23.1990                                   | 0.4605                        | 0.9805                      |
| 40     | 12      | 0.71776                      | 20.6803                                   | 0.0207                        | 0.9990                      |
| 40     | 10      | 0.62861                      | 16.8548                                   | 0.9998                        | 0.9998                      |
| 40     | 5       | 0.11305                      | 2.1211                                    | 1.0000                        | 1.0000                      |
| 40     | 2       | 0.037127                     | 0.7196                                    | 1.0000                        | 1.0000                      |
| 40     | 0.1     | 0.0016975                    | 0.0000                                    | 0.0000                        |                             |

#### 4°) EOBudE

EOBudE-rich phase :

| T (°C) | P (MPa) | $\rho$ (g.cm <sup>-3</sup> ) | Swelling (%) | [CO <sub>2</sub> ] (mol.L <sup>-1</sup> ) | [EOBudE] (mol.L <sup>-1</sup> ) | X <sub>CO<sub>2</sub></sub> |
|--------|---------|------------------------------|--------------|-------------------------------------------|---------------------------------|-----------------------------|
| 100    | 20      | 0.48053                      | 38.81        | 5.78                                      | 0.95                            | 0.86                        |
| 100    | 18      | 0.42481                      | 37.29        | 5.61                                      | 0.96                            | 0.85                        |
| 100    | 15      | 0.33235                      | 31.54        | 5.25                                      | 1.00                            | 0.84                        |
| 100    | 12      | 0.24207                      | 26.26        | 4.49                                      | 1.05                            | 0.81                        |
| 100    | 10      | 0.18856                      | 15.78        | 3.62                                      | 1.14                            | 0.76                        |
| 100    | 8       | 0.14127                      | 15.78        | 2.67                                      | 1.14                            | 0.70                        |
| 100    | 5       | 0.080651                     | 6.01         | 1.31                                      | 1.25                            | 0.51                        |
| 100    | 2       | 0.029774                     | 0.90         | 0.47                                      | 1.31                            | 0.27                        |
| 100    | 0.1     | 0.0014218                    | 0.00         | 0.00                                      | 1.31                            |                             |
| 70     | 20      | 0.65905                      | 84.50        | 9.39                                      | 0.86                            | 0.92                        |
| 70     | 18      | 0.61224                      | 79.01        | 8.67                                      | 0.88                            | 0.91                        |
| 70     | 15      | 0.50588                      | 67.08        | 7.97                                      | 0.95                            | 0.89                        |
| 70     | 12      | 0.34585                      | 53.44        | 6.65                                      | 1.03                            | 0.87                        |
| 70     | 10      | 0.24777                      | 45.28        | 6.06                                      | 1.09                            | 0.85                        |
| 70     | 8       | 0.17362                      | 34.26        | 4.15                                      | 1.18                            | 0.78                        |
| 70     | 5       | 0.092865                     | 16.11        | 0.97                                      | 1.36                            | 0.42                        |
| 70     | 2       | 0.032963                     | 8.96         | 0.15                                      | 1.45                            | 0.09                        |
| 70     | 0.1     | 0.0015473                    | 0.00         | 0.00                                      | 1.58                            |                             |
| 40     | 20      | 0.83981                      | 58.26        | 10.89                                     | 0.94                            | 0.92                        |
| 40     | 18      | 0.83009                      | 57.38        | 10.81                                     | 0.94                            | 0.92                        |
| 40     | 15      | 0.78023                      | 56.50        | 10.68                                     | 0.95                            | 0.92                        |
| 40     | 12      | 0.71776                      | 58.26        | 10.53                                     | 0.94                            | 0.92                        |
| 40     | 10      | 0.62861                      | 59.15        | 10.62                                     | 0.93                            | 0.92                        |
| 40     | 8       | 0.2779                       | 48.26        | 9.54                                      | 1.00                            | 0.91                        |
| 40     | 5       | 0.11305                      | 24.10        | 5.97                                      | 1.19                            | 0.83                        |
| 40     | 2       | 0.037127                     | 1.70         | 0.45                                      | 1.46                            | 0.24                        |
| 40     | 0.1     | 0.0016975                    | 0.00         | 0.00                                      | 1.47                            |                             |

**CO<sub>2</sub>-rich phase :**

| T (°C) | P (MPa) | $\rho$ (g.cm <sup>-3</sup> ) | [CO <sub>2</sub> ] (mol.L <sup>-1</sup> ) | [EOBudE] (mol.L <sup>-1</sup> ) | X <sub>CO<sub>2</sub></sub> |
|--------|---------|------------------------------|-------------------------------------------|---------------------------------|-----------------------------|
| 100    | 20      | 0.48053                      | 12.4044                                   | 0.0029                          | 0.9998                      |
| 100    | 18      | 0.42481                      | 9.4311                                    | 0.0012                          | 0.9999                      |
| 100    | 15      | 0.33235                      | 6.1738                                    | 0.0003                          | 1.0000                      |
| 100    | 12      | 0.24207                      | 4.3368                                    | 0.0001                          | 1.0000                      |
| 100    | 10      | 0.18856                      | 3.1816                                    | 0.0001                          | 1.0000                      |
| 100    | 8       | 0.14127                      | 2.1400                                    | 0.0000                          | 1.0000                      |
| 100    | 5       | 0.080651                     | 1.3635                                    | 0.0000                          | 1.0000                      |
| 100    | 2       | 0.029774                     | 0.5303                                    | 0.0000                          | 0.9999                      |
| 100    | 0.1     | 0.0014218                    | 0.0000                                    | 0.0000                          |                             |
| 70     | 20      | 0.65905                      | 14.9231                                   | 0.0065                          | 0.9996                      |
| 70     | 18      | 0.61224                      | 13.2376                                   | 0.0032                          | 0.9998                      |
| 70     | 15      | 0.50588                      | 10.2454                                   | 0.0008                          | 0.9999                      |
| 70     | 12      | 0.34585                      | 6.0980                                    | 0.0001                          | 1.0000                      |
| 70     | 10      | 0.24777                      | 4.3368                                    | 0.0000                          | 1.0000                      |
| 70     | 8       | 0.17362                      | 2.8975                                    | 0.0000                          | 1.0000                      |
| 70     | 5       | 0.092865                     | 1.3635                                    | 0.0000                          | 1.0000                      |
| 70     | 2       | 0.032963                     | 0.5681                                    | 0.0000                          | 1.0000                      |
| 70     | 0.1     | 0.0015473                    | 0.0000                                    | 0.0000                          |                             |
| 40     | 20      | 0.83981                      | 27.5358                                   | 0.0139                          | 0.9995                      |
| 40     | 18      | 0.83009                      | 25.8314                                   | 0.0106                          | 0.9996                      |
| 40     | 15      | 0.78023                      | 24.5057                                   | 0.0075                          | 0.9997                      |
| 40     | 12      | 0.71776                      | 21.5514                                   | 0.0051                          | 0.9998                      |
| 40     | 10      | 0.62861                      | 18.2183                                   | 0.0039                          | 0.9998                      |
| 40     | 8       | 0.2779                       | 6.5336                                    | 0.0001                          | 1.0000                      |
| 40     | 5       | 0.11305                      | 2.0453                                    | 0.0000                          | 1.0000                      |
| 40     | 2       | 0.037127                     | 0.8143                                    | 0.0000                          | 1.0000                      |
| 40     | 0.1     | 0.0016975                    | 0.0000                                    | 0.0000                          |                             |



### 5°) EUBudE

#### EUBudE-rich phase :

| T (°C) | P (MPa) | $\rho$ (g.cm <sup>-3</sup> ) | Swelling (%) | [CO <sub>2</sub> ] (mol.L <sup>-1</sup> ) | [EUBudE] (mol.L <sup>-1</sup> ) | X <sub>CO<sub>2</sub></sub> |
|--------|---------|------------------------------|--------------|-------------------------------------------|---------------------------------|-----------------------------|
| 100    | 20      | 0.48053                      | 50.00        | 5.51                                      | 1.34                            | 0.80                        |
| 100    | 18      | 0.42481                      | 44.19        | 4.87                                      | 1.40                            | 0.78                        |
| 100    | 15      | 0.33235                      | 37.12        | 4.22                                      | 1.47                            | 0.74                        |
| 100    | 12      | 0.24207                      | 31.86        | 3.84                                      | 1.53                            | 0.72                        |
| 100    | 10      | 0.18856                      | 28.82        | 3.33                                      | 1.56                            | 0.68                        |
| 100    | 8.5     | 0.14127                      | 24.86        | 2.82                                      | 1.61                            | 0.64                        |
| 100    | 7       | 0.1198                       | 16.10        | 2.20                                      | 1.73                            | 0.56                        |
| 100    | 5       | 0.080651                     | 12.88        | 1.42                                      | 1.78                            | 0.44                        |
| 100    | 2       | 0.029774                     | 7.71         | 0.68                                      | 1.87                            | 0.27                        |
| 100    | 0.1     | 0.0014218                    | 0.00         | 0.00                                      | 2.01                            |                             |
| 70     | 20      | 0.65905                      | 77.78        | 7.94                                      | 1.18                            | 0.87                        |
| 70     | 18      | 0.61224                      | 69.34        | 7.83                                      | 1.23                            | 0.86                        |
| 70     | 15      | 0.50588                      | 55.70        | 7.07                                      | 1.34                            | 0.84                        |
| 70     | 12      | 0.34585                      | 46.84        | 6.11                                      | 1.42                            | 0.81                        |
| 70     | 11      | 0.29373                      | 39.76        | 5.78                                      | 1.50                            | 0.79                        |
| 70     | 10      | 0.24777                      | 35.28        | 5.38                                      | 1.54                            | 0.78                        |
| 70     | 9       | 0.20804                      | 29.61        | 4.81                                      | 1.61                            | 0.75                        |
| 70     | 7       | 0.1435                       | 22.11        | 3.99                                      | 1.71                            | 0.70                        |
| 70     | 6       | 0.11681                      | 18.07        | 3.48                                      | 1.77                            | 0.66                        |
| 70     | 5       | 0.092865                     | 14.85        | 2.90                                      | 1.82                            | 0.61                        |
| 70     | 3       | 0.051295                     | 7.16         | 1.87                                      | 1.95                            | 0.49                        |
| 70     | 2       | 0.032963                     | 2.20         | 1.19                                      | 2.04                            | 0.37                        |
| 70     | 0.1     | 0.0015473                    | 0.00         | 0.00                                      | 2.09                            |                             |
| 40     | 20      | 0.83981                      | 125.00       | 12.26                                     | 0.97                            | 0.93                        |
| 40     | 18      | 0.81951                      | 112.23       | 11.47                                     | 1.03                            | 0.92                        |
| 40     | 15      | 0.78023                      | 99.18        | 10.59                                     | 1.10                            | 0.91                        |
| 40     | 12      | 0.71776                      | 84.79        | 10.22                                     | 1.18                            | 0.90                        |
| 40     | 10      | 0.62861                      | 76.73        | 9.40                                      | 1.24                            | 0.88                        |
| 40     | 9       | 0.4855                       | 69.93        | 9.22                                      | 1.29                            | 0.88                        |
| 40     | 8       | 0.2779                       | 55.77        | 8.12                                      | 1.41                            | 0.85                        |
| 40     | 7       | 0.19802                      | 47.27        | 0.33                                      | 1.49                            | 0.84                        |
| 40     | 6       | 0.14926                      | 33.88        | 0.27                                      | 1.63                            | 0.79                        |
| 40     | 5       | 0.11305                      | 26.23        | 0.23                                      | 1.73                            | 0.75                        |
| 40     | 4       | 0.083758                     | 19.70        | 0.19                                      | 1.83                            | 0.70                        |
| 40     | 3       | 0.058892                     | 14.89        | 0.14                                      | 1.91                            | 0.63                        |
| 40     | 2.2     | 0.037127                     | 13.55        | 0.11                                      | 1.93                            | 0.56                        |
| 40     | 0.1     | 0.0016975                    | 0.00         | 0.00                                      | 2.19                            |                             |

**CO<sub>2</sub>-rich phase :**

| T (°C) | P (MPa) | $\rho$ (g.cm <sup>-3</sup> ) | [CO <sub>2</sub> ] (mol.L <sup>-1</sup> ) | [EUBudE] (mol.L <sup>-1</sup> ) | X <sub>CO<sub>2</sub></sub> |
|--------|---------|------------------------------|-------------------------------------------|---------------------------------|-----------------------------|
| 100    | 20      | 0.48053                      | 7.4990                                    | 0.0016                          | 0.9998                      |
| 100    | 19.3    | 0.45352                      | 7.0480                                    | 0.0011                          | 0.9998                      |
| 100    | 18.1    | 0.42481                      | 6.3713                                    | 0.0007                          | 0.9999                      |
| 100    | 17.3    | 0.39471                      | 5.8639                                    | 0.0005                          | 0.9999                      |
| 100    | 15      | 0.33235                      | 4.5530                                    | 0.0002                          | 1.0000                      |
| 100    | 14      | 0.3013                       | 4.0314                                    | 0.0001                          | 1.0000                      |
| 100    | 12.5    | 0.24207                      | 3.1998                                    | 0.0001                          | 1.0000                      |
| 100    | 10      | 0.18856                      | 2.2835                                    | 0.0001                          | 1.0000                      |
| 100    | 8       | 0.14127                      | 1.6069                                    | 0.0000                          | 1.0000                      |
| 100    | 5       | 0.080651                     | 0.7894                                    | 0.0000                          | 1.0000                      |
| 100    | 4       | 0.062749                     | 0.6343                                    | 0.0000                          | 1.0000                      |
| 100    | 2       | 0.029774                     | 0.2960                                    | 0.0000                          | 0.9999                      |
| 100    | 1       | 0.014525                     | 0.1410                                    | 0.0000                          | 0.9999                      |
| 100    | 0.1     | 0.0014218                    | 0.0000                                    | 0.0000                          |                             |
| 70     | 20      | 0.65905                      | 12.3198                                   | 0.0044                          | 0.9996                      |
| 70     | 18      | 0.61224                      | 11.2062                                   | 0.0036                          | 0.9997                      |
| 70     | 17      | 0.58279                      | 10.4733                                   | 0.0029                          | 0.9997                      |
| 70     | 16      | 0.54775                      | 9.6980                                    | 0.0019                          | 0.9998                      |
| 70     | 15      | 0.50588                      | 8.6831                                    | 0.0010                          | 0.9999                      |
| 70     | 14      | 0.45662                      | 7.4426                                    | 0.0005                          | 0.9999                      |
| 70     | 13.1    | 0.40175                      | 6.3009                                    | 0.0002                          | 1.0000                      |
| 70     | 12      | 0.34585                      | 5.0745                                    | 0.0001                          | 1.0000                      |
| 70     | 10      | 0.24777                      | 3.3548                                    | 0.0000                          | 1.0000                      |
| 70     | 8.6     | 0.20804                      | 2.5091                                    | 0.0000                          | 1.0000                      |
| 70     | 6       | 0.11681                      | 1.4942                                    | 0.0000                          | 1.0000                      |
| 70     | 2       | 0.032963                     | 0.4934                                    | 0.0000                          | 1.0000                      |
| 70     | 0.1     | 0.0015473                    | 0.0000                                    | 0.0000                          |                             |
| 40     | 20      | 0.83981                      | 19.4523                                   | 0.0180                          | 0.9991                      |
| 40     | 18      | 0.83009                      | 18.9167                                   | 0.0149                          | 0.9992                      |
| 40     | 15      | 0.78023                      | 17.2675                                   | 0.0079                          | 0.9995                      |
| 40     | 12      | 0.71776                      | 15.1108                                   | 0.0040                          | 0.9997                      |
| 40     | 10      | 0.62861                      | 12.7709                                   | 0.0033                          | 0.9997                      |
| 40     | 8       | 0.2779                       | 4.2288                                    | 0.0000                          | 1.0000                      |
| 40     | 5.5     | 0.11305                      | 1.8466                                    | 0.0000                          | 1.0000                      |
| 40     | 2       | 0.037127                     | 0.5920                                    | 0.0000                          | 1.0000                      |
| 40     | 0.1     | 0.0016975                    | 0.0000                                    | 0.0000                          |                             |

6°) EOPrdE

EOPrdE-rich phase :

| T (°C) | P (MPa) | $\rho$ (g.cm <sup>-3</sup> ) | Swelling (%) | [CO <sub>2</sub> ] (mol.L <sup>-1</sup> ) | [EOPrdE] (mol.L <sup>-1</sup> ) | X <sub>CO<sub>2</sub></sub> |
|--------|---------|------------------------------|--------------|-------------------------------------------|---------------------------------|-----------------------------|
| 100    | 20      | 0.48053                      | 37.50        | 5.17                                      | 0.96                            | 0.84                        |
| 100    | 18      | 0.42481                      | 33.64        | 4.69                                      | 0.98                            | 0.83                        |
| 100    | 15      | 0.33235                      | 27.11        | 4.18                                      | 1.03                            | 0.80                        |
| 100    | 14      | 0.3013                       | 24.89        | 4.04                                      | 1.05                            | 0.79                        |
| 100    | 12      | 0.24207                      | 18.18        | 3.46                                      | 1.11                            | 0.76                        |
| 100    | 11.2    | 0.21453                      | 16.26        | 3.23                                      | 1.13                            | 0.74                        |
| 100    | 10.6    | 0.18856                      | 12.60        | 3.09                                      | 1.17                            | 0.73                        |
| 100    | 8       | 0.14127                      | 8.75         | 2.39                                      | 1.21                            | 0.66                        |
| 100    | 6       | 0.099632                     | 3.62         | 1.94                                      | 1.27                            | 0.60                        |
| 100    | 5       | 0.080651                     | 2.88         | 1.64                                      | 1.28                            | 0.56                        |
| 100    | 3       | 0.045821                     | 0.00         | 1.16                                      | 1.31                            | 0.47                        |
| 100    | 2       | 0.029774                     | 0.00         | 0.82                                      | 1.35                            | 0.38                        |
| 100    | 0.1     | 0.0014218                    | 0.00         | 0.00                                      | 1.41                            |                             |
| 70     | 20      | 0.65905                      | 62.56        | 6.22                                      | 0.93                            | 0.87                        |
| 70     | 18      | 0.61224                      | 62.56        | 6.13                                      | 0.93                            | 0.87                        |
| 70     | 15      | 0.50588                      | 64.18        | 6.05                                      | 0.92                            | 0.87                        |
| 70     | 14      | 0.45662                      | 60.19        | 5.88                                      | 0.95                            | 0.86                        |
| 70     | 12      | 0.34585                      | 52.78        | 5.62                                      | 0.99                            | 0.85                        |
| 70     | 10      | 0.24777                      | 35.25        | 5.05                                      | 1.12                            | 0.82                        |
| 70     | 8.5     | 0.17362                      | 24.53        | 3.51                                      | 1.22                            | 0.74                        |
| 70     | 5       | 0.092865                     | 8.91         | 1.73                                      | 1.39                            | 0.55                        |
| 70     | 4       | 0.07116                      | 9.27         | 1.32                                      | 1.39                            | 0.49                        |
| 70     | 3       | 0.051295                     | 4.10         | 0.95                                      | 1.46                            | 0.40                        |
| 70     | 2       | 0.032963                     | 0.92         | 0.63                                      | 1.50                            | 0.30                        |
| 70     | 0.1     | 0.0015473                    | 0.00         | 0.00                                      | 1.52                            |                             |
| 40     | 20      | 0.83981                      | 85.71        | 9.50                                      | 0.84                            | 0.92                        |
| 40     | 18      | 0.81951                      | 83.70        | 9.25                                      | 0.84                            | 0.92                        |
| 40     | 15      | 0.78023                      | 73.33        | 8.88                                      | 0.90                            | 0.91                        |
| 40     | 12      | 0.71776                      | 64.08        | 8.40                                      | 0.95                            | 0.90                        |
| 40     | 10      | 0.62861                      | 57.21        | 7.51                                      | 0.99                            | 0.88                        |
| 40     | 9       | 0.4855                       | 54.34        | 7.17                                      | 1.01                            | 0.88                        |
| 40     | 8       | 0.2779                       | 45.06        | 6.72                                      | 1.07                            | 0.86                        |
| 40     | 7       | 0.19802                      | 35.20        | 5.87                                      | 1.15                            | 0.84                        |
| 40     | 6       | 0.14926                      | 25.65        | 4.83                                      | 1.24                            | 0.80                        |
| 40     | 3       | 0.058892                     | 10.46        | 2.67                                      | 1.41                            | 0.65                        |
| 40     | 2       | 0.037127                     | 8.68         | 1.98                                      | 1.43                            | 0.58                        |
| 40     | 0.1     | 0.0016975                    | 0.00         | 0.00                                      | 1.55                            |                             |

**CO<sub>2</sub>-rich phase :**

| T (°C) | P (MPa) | $\rho$ (g.cm <sup>-3</sup> ) | [CO <sub>2</sub> ] (mol.L <sup>-1</sup> ) | [EOPrdE] (mol.L <sup>-1</sup> ) | X <sub>CO<sub>2</sub></sub> |
|--------|---------|------------------------------|-------------------------------------------|---------------------------------|-----------------------------|
| 100    | 20      | 0.48053                      | 8.4563                                    | 0.0012                          | 0.9999                      |
| 100    | 18      | 0.42481                      | 7.1035                                    | 0.0006                          | 0.9999                      |
| 100    | 15      | 0.33235                      | 5.2636                                    | 0.0002                          | 1.0000                      |
| 100    | 12      | 0.24207                      | 3.4533                                    | 0.0001                          | 1.0000                      |
| 100    | 10      | 0.18856                      | 2.7056                                    | 0.0001                          | 1.0000                      |
| 100    | 8       | 0.14127                      | 1.8201                                    | 0.0000                          | 1.0000                      |
| 100    | 5       | 0.080651                     | 0.9839                                    | 0.0000                          | 1.0000                      |
| 100    | 2       | 0.029774                     | 0.4329                                    | 0.0000                          | 1.0000                      |
| 100    | 0.1     | 0.0014218                    | 0.0000                                    | 0.0000                          |                             |
| 70     | 20      | 0.65905                      | 12.5876                                   | 0.0053                          | 0.9996                      |
| 70     | 18      | 0.61224                      | 11.2203                                   | 0.0035                          | 0.9997                      |
| 70     | 15      | 0.50588                      | 8.7677                                    | 0.0009                          | 0.9999                      |
| 70     | 12      | 0.34585                      | 5.0322                                    | 0.0002                          | 1.0000                      |
| 70     | 10      | 0.24777                      | 3.9010                                    | 0.0001                          | 1.0000                      |
| 70     | 8       | 0.17362                      | 2.7105                                    | 0.0000                          | 1.0000                      |
| 70     | 5       | 0.092865                     | 1.4660                                    | 0.0000                          | 1.0000                      |
| 70     | 2       | 0.032963                     | 0.5854                                    | 0.0000                          | 0.9999                      |
| 70     | 0.1     | 0.0015473                    | 0.0000                                    | 0.0000                          |                             |
| 40     | 20      | 0.83981                      | 19.2550                                   | 0.0213                          | 0.9989                      |
| 40     | 18      | 0.83009                      | 18.2260                                   | 0.0177                          | 0.9990                      |
| 40     | 15      | 0.78023                      | 17.4930                                   | 0.0136                          | 0.9992                      |
| 40     | 12      | 0.71776                      | 15.7592                                   | 0.0083                          | 0.9995                      |
| 40     | 10      | 0.62861                      | 13.6871                                   | 0.0047                          | 0.9997                      |
| 40     | 8       | 0.2779                       | 5.2440                                    | 0.0006                          | 0.9999                      |
| 40     | 5       | 0.11305                      | 1.7759                                    | 0.0001                          | 1.0000                      |
| 40     | 2.5     | 0.037127                     | 0.7871                                    | 0.0000                          | 1.0000                      |
| 40     | 0.1     | 0.0016975                    | 0.0000                                    | 0.0000                          |                             |

## 7°) EVHOSO

### EVHOSO-rich phase :

| T (°C) | P (MPa) | $\rho$ (g.cm <sup>-3</sup> ) | Swelling (%) | [CO <sub>2</sub> ] (mol.L <sup>-1</sup> ) | [EVHOSO] (mol.L <sup>-1</sup> ) | X <sub>CO<sub>2</sub></sub> |
|--------|---------|------------------------------|--------------|-------------------------------------------|---------------------------------|-----------------------------|
| 100    | 20      | 0.48053                      | 4.02         | 0.91                                      | 0.92                            | 0.50                        |
| 100    | 18      | 0.42481                      | 2.70         | 0.32                                      | 0.93                            | 0.25                        |
| 100    | 15      | 0.33235                      | 1.03         | 0.26                                      | 0.95                            | 0.22                        |
| 100    | 12      | 0.24207                      | -0.11        | 0.19                                      | 0.96                            | 0.17                        |
| 100    | 10      | 0.18856                      | 0.84         | 0.14                                      | 0.95                            | 0.13                        |
| 100    | 8       | 0.14127                      | 0.43         | 0.15                                      | 0.96                            | 0.14                        |
| 100    | 5       | 0.080651                     | 1.49         | 0.12                                      | 0.95                            | 0.11                        |
| 100    | 2       | 0.029774                     | 1.04         | 0.10                                      | 0.95                            | 0.10                        |
| 100    | 0.1     | 0.0014218                    | 0.00         | 0.00                                      | 0.95                            |                             |
| 70     | 20      | 0.65905                      | 64.73        | 7.86                                      | 0.60                            | 0.93                        |
| 70     | 18      | 0.61224                      | 64.94        | 7.88                                      | 0.60                            | 0.93                        |
| 70     | 15      | 0.50588                      | 59.01        | 7.26                                      | 0.62                            | 0.92                        |
| 70     | 14      | 0.45662                      | 53.25        | 6.86                                      | 0.65                            | 0.91                        |
| 70     | 12      | 0.34585                      | 48.37        | 6.44                                      | 0.67                            | 0.91                        |
| 70     | 10      | 0.24777                      | 40.85        | 5.52                                      | 0.70                            | 0.89                        |
| 70     | 9       | 0.20804                      | 37.50        | 5.01                                      | 0.72                            | 0.87                        |
| 70     | 8       | 0.17362                      | 31.99        | 4.16                                      | 0.75                            | 0.85                        |
| 70     | 6       | 0.11681                      | 24.79        | 2.76                                      | 0.79                            | 0.78                        |
| 70     | 5       | 0.092865                     | 14.52        | 1.47                                      | 0.86                            | 0.63                        |
| 70     | 4       | 0.07116                      | 10.73        | 0.38                                      | 0.89                            | 0.30                        |
| 70     | 2       | 0.032963                     | 6.60         | 0.17                                      | 0.93                            | 0.15                        |
| 70     | 0.1     | 0.0015473                    | 0.00         | 0.00                                      | 0.98                            |                             |
| 40     | 20      | 0.83981                      | 87.26        | 11.18                                     | 0.57                            | 0.95                        |
| 40     | 18      | 0.83009                      | 93.64        | 11.41                                     | 0.55                            | 0.95                        |
| 40     | 15      | 0.78023                      | 84.34        | 10.89                                     | 0.58                            | 0.95                        |
| 40     | 14      | 0.76327                      | 84.64        | 10.55                                     | 0.57                            | 0.95                        |
| 40     | 12      | 0.71776                      | 80.50        | 10.33                                     | 0.59                            | 0.95                        |
| 40     | 10      | 0.62861                      | 75.63        | 9.89                                      | 0.60                            | 0.94                        |
| 40     | 9       | 0.4855                       | 67.78        | 9.14                                      | 0.63                            | 0.94                        |
| 40     | 8       | 0.2779                       | 61.37        | 8.32                                      | 0.66                            | 0.93                        |
| 40     | 5       | 0.11305                      | 35.77        | 4.71                                      | 0.78                            | 0.86                        |
| 40     | 4       | 0.083758                     | 22.19        | 2.49                                      | 0.87                            | 0.74                        |
| 40     | 2       | 0.037127                     | 10.52        | 0.21                                      | 0.96                            | 0.18                        |
| 40     | 0.1     | 0.0016975                    | 0.00         | 0.00                                      | 1.06                            |                             |

**CO<sub>2</sub>-rich phase :**

| T (°C) | P (MPa) | $\rho$ (g.cm <sup>-3</sup> ) | [CO <sub>2</sub> ] (mol.L <sup>-1</sup> ) | [EVHOSO] (mol.L <sup>-1</sup> ) | X <sub>CO<sub>2</sub></sub> |
|--------|---------|------------------------------|-------------------------------------------|---------------------------------|-----------------------------|
| 100    | 20      | 0.48053                      | 10.0750                                   | 0.0001                          | 1.0000                      |
| 100    | 18      | 0.42481                      | 7.7267                                    | 0.0000                          | 1.0000                      |
| 100    | 15      | 0.33235                      | 6.0033                                    | 0.0000                          | 1.0000                      |
| 100    | 12      | 0.24207                      | 4.1664                                    | 0.0000                          | 1.0000                      |
| 100    | 10      | 0.18856                      | 3.1816                                    | 0.0000                          | 1.0000                      |
| 100    | 8       | 0.14127                      | 1.9127                                    | 0.0000                          | 1.0000                      |
| 100    | 5       | 0.080651                     | 1.0226                                    | 0.0000                          | 1.0000                      |
| 100    | 2       | 0.029774                     | 0.3030                                    | 0.0000                          | 1.0000                      |
| 100    | 0.1     | 0.0014218                    | 0                                         | 0                               |                             |
| 70     | 20      | 0.65905                      | 15.7841                                   | 0.0003                          | 1.0000                      |
| 70     | 18      | 0.61224                      | 13.9243                                   | 0.0001                          | 1.0000                      |
| 70     | 15      | 0.50588                      | 11.2605                                   | 0.0000                          | 1.0000                      |
| 70     | 12      | 0.34585                      | 7.2054                                    | 0.0000                          | 1.0000                      |
| 70     | 10      | 0.24777                      | 5.0890                                    | 0.0000                          | 1.0000                      |
| 70     | 8       | 0.17362                      | 2.9260                                    | 0.0000                          | 1.0000                      |
| 70     | 5       | 0.092865                     | 1.6254                                    | 0.0000                          | 1.0000                      |
| 70     | 2       | 0.032963                     | 0.7039                                    | 0.0000                          | 1.0000                      |
| 70     | 0.1     | 0.0015473                    | 0                                         | 0                               |                             |
| 40     | 20      | 0.83981                      | 25.8693                                   | 0.0026                          | 0.9999                      |
| 40     | 18      | 0.83009                      | 24.2974                                   | 0.0019                          | 0.9999                      |
| 40     | 15      | 0.78023                      | 22.1574                                   | 0.0009                          | 1.0000                      |
| 40     | 12      | 0.71776                      | 19.4872                                   | 0.0002                          | 1.0000                      |
| 40     | 10      | 0.62861                      | 15.0367                                   | 0.0001                          | 1.0000                      |
| 40     | 8       | 0.2779                       | 6.0033                                    | 0.0000                          | 1.0000                      |
| 40     | 5       | 0.11305                      | 1.9127                                    | 0.0000                          | 1.0000                      |
| 40     | 2       | 0.037127                     | 0.7954                                    | 0.0000                          | 1.0000                      |
| 40     | 0.1     | 0.0016975                    | 0                                         | 0                               |                             |
